# Supplementary material for: Aberrant Peripheral Immune Function in a Good Syndrome Patient
Source: Hindawi journal article supplement (doi:10.1155/2018/6212410), 2018-01-01
Supplement: f1 [file 6212410.f1.pdf]

## Supplemental Figure S1

Fig.S1

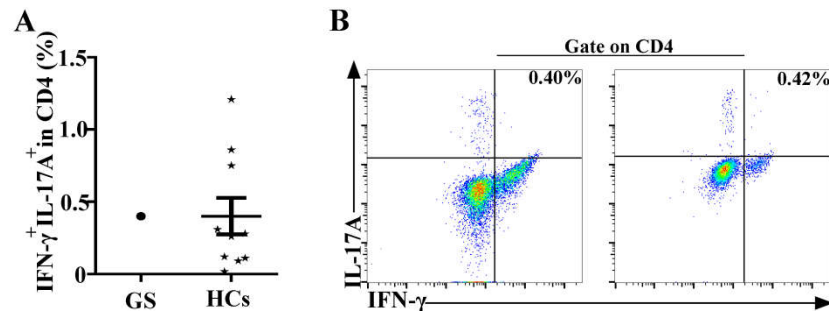

Figure S1.

- A. The statistical comparison of IFN- $\gamma^+$  IL-17A $^+$  cells in CD4 $^+$  T cells with this GS patient and HCs (N=10).
- B. Representative dot plot of IFN- $\gamma^+$  IL-17A $^+$  cells derived from peripheral CD4 $^+$  T cells in this GS patient and HCs.
